## ADRENERGIC CONTROL OF OXYGEN TRANSFER IN PERFUSED GILLS OF THE COD, *GADUS MORHUA*

By KNUT PETTERSSON

*Department of Zoophysiology, University of Göteborg, Göteborg, Sweden*

*(Received 30 July 1982 — Accepted 9 September 1982)*

### SUMMARY

A perfused and ventilated gill preparation is described in which the  $pO_2$  of the perfusion medium and the irrigating water is controlled. Dorsal aorta effluent  $pO_2$  and flow were measured together with the branchial vascular resistance.

Decreasing  $pO_2$  in the perfusion fluid caused increased branchial vascular resistance, probably by constriction of efferent lamellar arterioles.  $\alpha$ -adrenoceptor stimulation caused constriction of arteriovenous connections and of efferent lamellar arterioles, and enhanced oxygenation of the perfusion fluid.  $\beta$ -adrenoceptor stimulation also increased  $O_2$  transfer, but to a lesser extent.

It is suggested that both hypoxia and  $\alpha$ -adrenoceptor stimulation improved  $O_2$  transfer via constriction of efferent lamellar arterioles. Both stimuli may also increase systemic blood flow by constriction of the arteriovenous connections, although such an effect of hypoxia has not been clearly shown.  $\beta$ -stimulation probably increased  $O_2$  transfer by dilation of afferent lamellar arterioles, thereby causing recruitment of unperfused lamellae.

### INTRODUCTION

Since Krawkow (1913) reported that vasodilation is the main response to adrenaline of the branchial vascular bed a number of studies on the control of the branchial vasculature have been performed (see Wood, 1975; Smith, 1977). The response to catecholamines is now known to be biphasic, consisting of a  $\beta$ -adrenergic dilation and an  $\alpha$ -adrenergic constriction in perfused gill preparations (Reite, 1969; Belaud, Peyraud-Waitzenegger & Peyraud, 1971; Bergman, Olson & Fromm, 1974; Wood, 1975; Dunel & Laurent, 1977; Payan & Girard, 1977; Claiborne & Evans, 1980; Wahlqvist, 1980, 1981; Nilsson & Pettersson, 1981). A decrease in branchial vascular resistance following catecholamine injections *in vivo* has been reported [e.g. in the cod, *Gadus morhua*, (Pettersson & Nilsson, 1980), and the lingcod, *Ophiodon elongatus* (Farrell, 1981)] while Wood & Shelton (1980) have demonstrated that adrenaline causes either dilation or constriction of the branchial vasculature in the rainbow trout, *Salmo gairdneri*.

It has also been shown that adrenaline increases arterial  $pO_2$  in the eel, *Anguilla anguilla*, *in vivo* (Steen & Krusysse, 1964; Peyraud-Waitzenegger, 1979) and oxygen transfer in perfused gill preparations (Pettersson & Johansen, 1982; Pärt, Tuurala &

Soivio, 1982) and in totally perfused rainbow trout (Wood, McMahon & MacDonald, 1978). The aim of this study was to investigate the nature of the adrenergic receptors which control oxygen transfer.

#### MATERIALS AND METHODS

Atlantic cod, *Gadus morhua*, of both sexes, weighing between 600 and 1000 g, were used in this study. After capture they were kept in re-circulated, aerated sea water at 10°C.

Fish were stunned by a blow on the head, and approximately 1500 i.u. of heparin was injected into the caudal blood vessels. After 5 min the head was removed from the body, and a slow perfusion of the gills was made through a catheter (PE90) inserted into the bulbus arteriosus. The effluent from the perfused head was collected from another catheter (PE90) in the dorsal aorta. The coeliaco-mesenteric artery was ligated and the head was immersed in sea water. The gills were irrigated with sea water at approx. 1200 ml min<sup>-1</sup> with an Eheim pump through a Y-tube in the mouth.

To record ventral aortic pressure (PVA) the ventral aortic catheter was connected to a Statham P23 pressure transducer via a T-piece. The dorsal aortic effluent was passed through a Radiometer E 5046 O<sub>2</sub> electrode and a Grass photoelectric drop counter. The O<sub>2</sub> electrode was connected to a radiometer PHM 71 or 73 and a Goerz Servogor potentiometric recorder displaying pO<sub>2</sub> of the dorsal aortic effluent, p<sub>da</sub>O<sub>2</sub>. The drop counter was connected to a Grass mod. 7 polygraph, and a tachograph (Grass mod. 7P4 or 7P44) converted the signal to drops min<sup>-1</sup>. The pressure transducer was also connected to the Grass polygraph.

The gills were perfused with approx. 8–10 ml min<sup>-1</sup> kg bw<sup>-1</sup> by a Gilson peristaltic pump with a filtered Ringer's solution (House & Greene, 1964) containing glucose at a concentration of 1 g l<sup>-1</sup>. Its pO<sub>2</sub> was adjusted to the desired level with a Wösthoff mod. 301 gas mixing pump. No CO<sub>2</sub> was dissolved in the Ringer's solution, and its pH therefore increased from approx. 7.3 at the start to approx. 8.0 at termination of the experiments. This increase had no effect on the measured variables.

Johansen & Pettersson (1981) showed that O<sub>2</sub> consumption of the gill tissue is high. The O<sub>2</sub> utilized is partly taken directly from the irrigating water to the O<sub>2</sub> consuming cells, but also from the blood stream. Control experiments to ensure that it was oxygenation of the perfusion fluid that was studied, and not the O<sub>2</sub> utilization by the branchial tissue, were therefore performed.

In *series A* pO<sub>2</sub> of both the irrigating water (p<sub>i</sub>O<sub>2</sub>) and the perfusion medium reaching the gills (p<sub>v</sub>O<sub>2</sub>) was equal (approx. 157 mmHg; air saturation). Oxygen extraction from the perfusion fluid could be studied in this series, and whether the drugs themselves affected the extraction of O<sub>2</sub> from the perfusion fluid in this 'non-respiratory' preparation was also investigated.

In *series B* p<sub>i</sub>O<sub>2</sub> was still kept at air saturation, but p<sub>v</sub>O<sub>2</sub> was decreased to 23 ± 2 mmHg (s.e.m.), and a 'natural' O<sub>2</sub> diffusion gradient was thus created. If the preparation is functional O<sub>2</sub> will diffuse to the perfusion fluid and elevate p<sub>da</sub>O<sub>2</sub>. Effects of drugs on p<sub>da</sub>O<sub>2</sub>, other than those seen in series A can thus be ascribed to effects on O<sub>2</sub> transfer.

Further control experiments were performed in *series C*. p<sub>v</sub>O<sub>2</sub> was elevated ■

approx.  $290 \pm 8$  mmHg (s.e.m.), with  $p_iO_2$  still kept at air saturation. If the effect on  $O_2$  transfer of the drugs seen in series B was reversed it seems reasonable to believe that  $O_2$  transfer, and not  $O_2$  utilization, was measured.

All experiments were performed at  $10^\circ\text{C}$ . The drugs used were dissolved in the Ringer's solution prior to use. Wahlqvist & Nilsson (1981) reported that the catecholamine concentration in cod plasma can exceed  $3 \times 10^{-7}$  M in stress, and a concentration of  $10^{-6}$  M of the agonists (adrenaline and isoprenaline) was therefore used. Complete blockade of the  $\alpha$ -adrenoceptor responses of the agonists in the concentration used is obtained with phentolamine  $10^{-5}$  M, and blockade of  $\beta$ -adrenoceptors can be made with  $3 \times 10^{-6}$  M propranolol (Nilsson & Pettersson, 1981). These concentrations of antagonists were therefore used in the present experiments.

Statistical treatment according to the Wilcoxon matched-pair signed-ranks test was performed when  $n$  exceeded 6.

#### RESULTS

The dorsal aorta catheter and the thermostatted cuvette of the  $O_2$  electrode added some resistance to flow through the perfusion system. By lowering the tip of the outflow catheter slightly below the water surface compensation was obtained for this resistance. After this adjustment dorsal aorta flow (FDA) averaged 26.5% of the total perfusion in series A. Although slightly lower in series B, flow was not significantly different from series A (Table 1). The venous drainage of the gills and the cephalic circulation were not ligated, and this flow together with the leakage from the cut ends of the systemic vessels explain the low flow through the dorsal aorta.

The perfusion rate was  $8\text{--}10$  ml  $\text{min}^{-1}$   $\text{kg bw}^{-1}$  and resulted in a perfusion pressure of  $3.9 \pm 0.54$  kPa in series A and  $4.7 \pm 0.23$  kPa in series B, which is significantly higher ( $P < 0.01$ ,  $n = 9$ ).

In series B PVA and FDA increased in response to adrenaline. The increase in FDA was significantly smaller than in series A (Table 1, Fig. 1).  $p_{da}O_2$  increased from  $61 \pm 11$  mmHg (s.e.m.) to  $80 \pm 12$  mmHg (s.e.m.) (Table 1, Fig. 1).

The effect of adrenaline administration after  $\beta$ -blockade with propranolol showed that the increase in PVA and FDA were due to  $\alpha$ -adrenoceptor stimulation (Table 1, Fig. 1).  $p_{da}O_2$  increased as much as prior to  $\beta$ -blockade (Table 1, Fig. 1).  $\beta$ -stimulation (isoprenaline or adrenaline following  $\alpha$ -blockade with phentolamine) decreased PVA and left FDA unchanged (Table 1, Fig. 1).  $p_{da}O_2$  increased by approx. 6 mmHg, a response that was only about 30% of that elicited by adrenaline itself or by adrenaline in the presence of propranolol (Fig. 1).

In series C  $p_{da}O_2$  was  $184 \pm 4$  mmHg. A decrease was found following both  $\alpha$ - and  $\beta$ -stimulation, showing that, in this case, catecholamines induced an increase in  $O_2$  loss across the gills. PVA and FDA increased due to  $\alpha$ -stimulation. PVA did not decrease when  $p_iO_2$  was increased above air saturation. The changes in FDA and PVA were not more marked in this series than in series A, suggesting that above a certain level branchial smooth muscle does not respond to changes in  $pO_2$ . The results in series C have not been statistically evaluated due to the small number of experiments ( $n = 4$ ).

Table 1. The results of adrenaline ( $10^{-6} M$ ) and selective  $\alpha$ - [adrenaline ( $10^{-6} M$ ) following propranolol ( $3 \times 10^{-6} M$ )] and  $\beta$ - [isoprenaline ( $10^{-6} M$ ) or adrenaline ( $10^{-6} M$ ) following phentolamine ( $10^{-5} M$ )] -adrenoceptor stimulation on the measured variables

In series A  $p_aO_2 = p_aO_2 =$  air saturation, in series B  $p_aO_2 = 23 \pm 2$  mmHg and  $p_aO_2 =$  air saturation. The value recorded immediately before agonist administration served as control. x:  $P < 0.05$ ; xx:  $P < 0.02$ ; xxx:  $P < 0.01$ . n = number of experiments.

| Series | Treatment       | PVA (kPa)         |                      | FDA (dpm)      |                        | $P_aO_2$ (mmHg)  |                      | n |
|--------|-----------------|-------------------|----------------------|----------------|------------------------|------------------|----------------------|---|
|        |                 | Control           | Stimulated           | Control        | Stimulated             | Control          | Stimulated           |   |
| A      | Adr             | $3.93 \pm 0.54^1$ | $4.44 \pm 0.59^{xx}$ | $43.6 \pm 2.2$ | $48.3 \pm 3.2^{xxx,2}$ | $128.3 \pm 3.2$  | $127.1 \pm 3.0$      | 8 |
|        | Adr after Prop  | $4.05 \pm 0.27$   | $5.25 \pm 0.15$      | $44.5 \pm 0.5$ | $51.0 \pm 4.0$         | $127.5 \pm 12.5$ | $130.5 \pm 9.5$      | 4 |
|        | Iso             | $3.08 \pm 0.35$   | $2.70 \pm 0.28$      | $43.0 \pm 2.9$ | $42.8 \pm 2.8$         | $129.0 \pm 3.7$  | $127.4 \pm 2.9$      | 4 |
|        | Adr after Phent | $5.10 \pm 1.35$   | $4.28 \pm 1.28$      | $45.0 \pm 0.5$ | $45.0 \pm 0.5$         | $142.0 \pm 1.9$  | $142.5 \pm 5.5$      | 4 |
| B      | Adr             | $4.68 \pm 0.23^1$ | $5.07 \pm 0.26$      | $39.9 \pm 3.5$ | $41.6 \pm 3.9^{x,2}$   | $60.9 \pm 10.7$  | $79.7 \pm 11.9^{xx}$ | 9 |
|        | Adr after Prop  | $4.63 \pm 0.27$   | $5.96 \pm 0.34$      | $37.8 \pm 4.3$ | $40.3 \pm 6.2$         | $70.5 \pm 13.9$  | $93.5 \pm 10.0$      | 4 |
|        | Iso             | $4.33 \pm 0.42$   | $3.28 \pm 0.25$      | $37.5 \pm 3.9$ | $37.0 \pm 3.9$         | $66.3 \pm 11.5$  | $75.3 \pm 15$        | 4 |
|        | Adr after Phent | $5.45 \pm 1.33$   | $4.50 \pm 1.20$      | $36.5 \pm 7.2$ | $35.9 \pm 7.5$         | $36.8 \pm 11.0$  | $42.5 \pm 15.1$      | 4 |

<sup>1</sup>In series B PVA was significantly higher than in series A ( $P < 0.05$ )

<sup>2</sup>The increase in FDA in series A was higher than in series B ( $P < 0.05$ )

Abbreviations: Adr = adrenaline; FDA = dorsal aorta flow; Iso = isoprenaline;  $p_aO_2$  = dorsal aorta effluent  $pO_2$ ; Phent = phentolamine; Prop = propranolol; PVA = ventral aorta pressure.

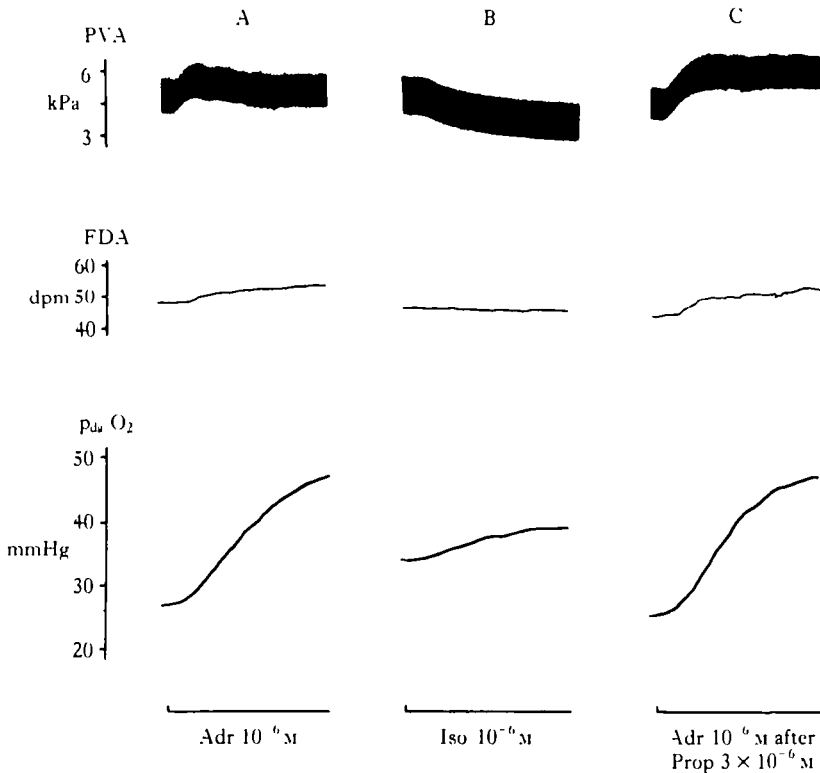

Fig. 1. Original tracings that show responses to adrenaline (A), isoprenaline (B) and adrenaline after application of propranolol (C). All traces are from one fish. Upper traces: ventral aorta pressure (PVA); middle traces: dorsal aorta flow (FDA); lower traces:  $pO_2$  of dorsal aorta effluent ( $p_{da}O_2$ ). Adr = adrenaline; Iso = isoprenaline; Prop = propranolol.

#### DISCUSSION

From the results of the series A experiments it is evident that extraction of  $O_2$  from the perfusion medium by the branchial tissue occurs as the fluid passes along the vascular channels, confirming the results of Johansen & Pettersson (1981) and Pettersson & Johansen (1982). This metabolic  $O_2$  utilization produced a decrease in  $pO_2$  from 157 to 128 mmHg in the perfusion fluid in series A. Nevertheless, in series B  $p_{da}O_2$  was about 60 mmHg when  $p_rO_2$  was only 23 mmHg, and as the Ringer solution passed the gills,  $pO_2$  decreased from 290 to 184 mmHg in series C. These results show that an exchange of  $O_2$  with the irrigating water was evident in both series B and C. The arterio-venous  $pO_2$  differences ( $p_{da}O_2 - p_rO_2$ ) in series B and C were 67 and  $-77$  mmHg, respectively, after compensation for the  $O_2$  extraction by the branchial tissue found in series A ( $157 - 128 = 29$  mmHg). The minus sign indicates a reversed direction of  $O_2$  transport in series C. The preparation is thus an efficient gas exchanger.

Knowledge of microcirculation in fish gills has developed rapidly with the use of modern vascular casting techniques.  $O_2$  and  $CO_2$  are exchanged with the environment in the secondary lamellae which receive venous blood via the afferent branchial (ABA), afferent filamental (AFA) arteries and the afferent lamellar (ALA) arterioles.

The drainage consists of efferent lamellar (ELA) arterioles, efferent filamental (EFA) and efferent branchial (EBA) arteries. Numerous vessels also arise from the EFA and EBA, and they are drained via the venous compartment of the gills (Gannon, Campbell & Randall, 1973; Vogel, Vogel & Schlote, 1974; Laurent & Dunel, 1976; Vogel, Vogel & Pfautsch, 1976; Cooke & Campbell, 1979; Vogel, 1979). The entire cardiac output does not therefore reach the systemic circulation. Connections between the afferent arterial system and the venous compartment have been described in the eel (Steen & Kruyse, 1964; Laurent & Dunel, 1976) and in the Channel catfish, *Ictalurus punctatus*, (Boland & Olson, 1979). A preliminary investigation in the cod showed no such connections (Nilsson & Pettersson, 1981). Fig. 2 shows the principal pathways for blood flow through the cod gills. All connections to the venous compartment have been grouped together as 'arterio-venous connections' (AVCs), since they could not be separated in this study.

Possible sites of action of the various stimuli used are also shown in Fig. 2. 'Hypoxic' vasoconstriction occurs at, or distal to, the secondary lamellae, but proximal to the AVCs (Pettersson & Johansen, 1982). The pillar cells are reported to contain contractile elements (Bettex-Galland & Hughes, 1973; Smith & Chamley-Campbell, 1981). Constriction in these cells would, however, restrict flow to the marginal channels of the secondary lamellae, which is unlikely to be advantageous in gas exchange. If, however, the ELAs constrict, pressure will increase in the secondary lamellae and in the afferent arterial system. The increased PVA may cause the recruitment of unperfused lamellae found after hypoxia in the rainbow trout (Booth, 1979), and may also affect gas transfer by altering the flow pattern within the secondary lamellae (Rankin & Maetz, 1971).

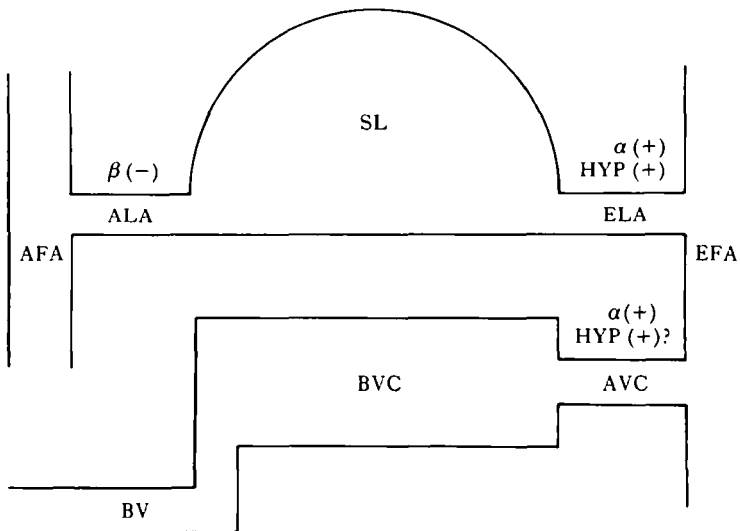

Fig. 2. The principal pathways for blood flow in cod gills. The proposed effector sites of the stimuli used in the study are indicated. Dilatory  $\beta$ -receptors are indicated as  $\beta(-)$ ; constrictory  $\alpha$ -receptors as  $\alpha(+)$ . HYP (+) indicates smooth muscle that contracts at low  $pO_2$ . AFA = afferent filamental artery; ALA = afferent lamellar arteriole; AVC = arterio-venous connections; BV = branchial vein; BVC = branchial venous compartment; EFA = efferent filamental artery; ELA = efferent lamellar arteriole; SL = secondary lamella.

The increase in FDA following adrenaline administration is concluded to be due to  $\alpha$ -stimulation of the AVCs (Fig. 2), supporting earlier findings (Dunel & Laurent, 1977; Payan & Girard, 1977; Claiborne & Evans, 1980; Nilsson & Pettersson, 1981). In a few preparations, where adrenaline increased PVA, no change in FDA was seen. This implies that an action also occurs proximal to the AVCs.

Lamellar recruitment occurs after an injection of adrenaline in the rainbow trout (Booth, 1979), a finding that has been confirmed by Holbert, Boland & Olson (1979) in the Channel catfish. A constriction of afferent arterial vessels is not likely to be consistent with lamellar recruitment. Nor is it likely to explain the pronounced increase in oxygen transfer (Table 1, Fig. 1). Constriction of the ELAs is, on the other hand, consistent with both these findings, and constriction of the ELAs is therefore suggested as response to  $\alpha$ -adrenoceptor stimulation. Constriction of the ELAs also followed the hypoxic stimulus (see above), which suggests that oxygen transfer is improved by this myogenic mechanism although it cannot be demonstrated in experiments of this type.

The increase in FDA caused by adrenaline, due to  $\alpha$ -stimulation of the AVCs, is less pronounced in series B than in series A (Table 1). This suggests that the AVCs also respond to low  $pO_2$ . Such an effect would increase the systemic blood flow in adverse circumstances (e.g. environmental hypoxia) and would thus be advantageous to the fish. The reduction in flow through the branchial venous compartment in the cod gills during hypoxia as reported by Pettersson & Johansen (1982) was, however, not significant. Ristori & Laurent (1977) also failed to detect any constriction in the arterio-venous pathway during hypoxia in perfused rainbow trout gills. This matter obviously requires further investigation.

$\beta$ -adrenergic stimulation must have decreased PVA due to an action proximal to the AVCs, because FDA remained almost constant (Table 1, Fig. 1). A relaxation of the pillar cells would decrease PVA and increase the functional surface area of the secondary lamellae, and thus explain the increased  $O_2$  transfer seen (Table 1). A relaxation of the ALAs would also explain these findings and appears to be a more likely interpretation since it could also explain the lamellar recruitment by adrenaline (Booth, 1979; Holbert, Boland & Olson, 1979).

Although the general response to adrenaline is a mixed  $\alpha$ -constrictory and  $\beta$ -dilatory response, the net increase in PVA seen in this study is in conflict with earlier findings in other species (Reite, 1969; Belaud *et al.* 1971; Bergman *et al.* 1974; Wood, 1975; Dunel & Laurent, 1977; Payan & Girard, 1977; Claiborne & Evans, 1980) and in the cod (Wahlqvist, 1981; Nilsson & Pettersson, 1981; Pettersson & Johansen, 1982). In the investigations of the latter authors the prevailing perfusion pressure was higher prior to adrenaline administration, and the relative influence of the  $\alpha$ - and  $\beta$ -responses may simply be due to the conditions prior to administration of the drug.

The increased  $O_2$  transfer induced by adrenaline may not only be due to circulatory adjustments. Haywood, Isaia & Maetz (1977) and Isaia, Maetz & Haywood (1978) presented evidence for an increased permeability for small lipophilic and water soluble substances (such as oxygen) of the secondary lamellae membrane following adrenaline injections. This effect would also explain increased  $O_2$  transfer.

In conclusion, the results presented above demonstrate that the resistance of the branchial vascular bed increases at low  $p_rO_2$ , and probably leads to adjustments in

flow through the secondary lamellae. Furthermore,  $\alpha$ -adrenoceptor stimulation strongly augments  $O_2$  exchange. Stimulation of the  $\beta$ -adrenoceptor also increases  $O_2$  exchange, but to a lesser extent. These effects, together with changes in ventilation and perfusion, are mechanisms to optimize  $O_2$  uptake during reduced ambient  $O_2$  availability.

I am grateful to Dr Stefan Nilsson for his valuable criticism of the manuscript, and to Ms Lena Seger for typing the manuscript. This investigation was supported by grants from the Swedish Natural Science Research Council and the Lars Hierta Foundation. I also wish to thank Mr I. Hakemar for supplying the fish.

## REFERENCES

- BELAUD, A., PEYRAUD-WAITZENEGGER, M. & PEYRAUD, C. (1971). Etude comparée des réactions vasomotrices des branchies perfusées de deux Téléostéens: la Carpe et le Congre. *C.r. Séanc. Soc. Biol.* **165**, 1114–1118.
- BERGMAN, H. L., OLSON, K. R. & FROMM, P. O. (1974). The effects of vaso-active agents on the functional surface area of the isolated-perfused gills of rainbow trout. *J. comp. Physiol.* **94**, 267–286.
- BETTEX-GALLAND, M. & HUGHES, G. M. (1973). Contractile filamentous material in the pillar cells of fish gills. *J. Cell. Sci.* **13**, 359–370.
- BOLAND, E. J. & OLSSON, K. R. (1979). Vascular organization of the catfish gill filament. *Cell Tissue Res.* **198**, 487–500.
- BOOTH, J. H. (1979). The effects of oxygen supply, epinephrine and acetylcholine on the distribution of blood flow in trout gills. *J. exp. Biol.* **83**, 31–39.
- CLAIBORNE, J. B. & EVANS, D. H. (1980). The isolated perfused head of the marine teleost fish, *Myoxocephalus octodecimspinosus*: Hemodynamic effects of epinephrine. *J. comp. Physiol.* **138**, 79–85.
- COOKE, I. R. C. & CAMPBELL, G. (1979). The vascular anatomy of the gills of the smooth toadfish *Torquigener glaber* (Teleostei: Tetraodontidae). *Zoomorphologie* **94**, 151–166.
- DUNEL, S. & LAURENT, P. (1977). La vascularisation branchiale chez l'Anguille: action de l'acetylcholine et de l'adrénaline sur la repartition d'une résine polymérisable dans les différents compartiments vasculaires. *C.r. hebd. Séanc. Acad. Sci., Paris* **284**, 2011–2014.
- FARRELL, A. P. (1981). Cardiovascular changes in the lingcod (*Ophiodon elongatus*) following adrenergic and cholinergic drug infusions. *J. exp. Biol.* **91**, 293–305.
- GANNON, B. J., CAMPBELL, G. & RANDALL, D. J. (1973). Scanning electron microscopy of vascular casts for the study of vessel connections in a complex vascular bed, the trout gill. *Thirty-first Annual Proceedings of the Electron Microscopy Society of America*, (ed. C. J. Arceneaux). New Orleans.
- HAYWOOD, G. P., ISAIA, J. & MAETZ, J. (1977). Epinephrine effects on branchial water and urea flux in rainbow trout. *Am. J. Physiol.* **232**, R110–R115.
- HOLBERT, P. W., BOLAND, E. J. & OLSON, K. R. (1979). The effect of epinephrine and acetylcholine on the distribution of red cells within the gills of the Channel catfish (*Ictalurus punctatus*). *J. exp. Biol.* **79**, 135–146.
- HOUSE, C. R. & GREENE, K. (1964). Ion and water transport in the isolated intestine of the marine teleost, *Cottus scorpius*. *J. exp. Biol.* **42**, 177–189.
- ISAIA, J., MAETZ, J. & HAYWOOD, G. P. (1978). Effects of epinephrine on branchial non-electrolyte permeability in rainbow trout. *J. exp. Biol.* **74**, 227–237.
- JOHANSEN, K. & PETTERSSON, K. (1981). Gill  $O_2$  consumption in a teleost fish, *Gadus morhua*. *Resp. Physiol.* **44**, 277–284.
- KRAWKOW, N. P. (1913). Über die Wirkung von Giften auf die Gefäße isolierter Fischkiemen. *Pflügers Arch. ges. Physiol.* **151**, 583–603.
- LAURENT, P. & DUNEL, S. (1976). Functional organization of the teleost gill. – I. Blood Pathways. *Acta Zool.* **57**, 189–209.
- NILSSON, S. & PETTERSSON, K. (1981). Sympathetic nervous control of blood flow in the gills of the Atlantic cod, *Gadus morhua*. *J. comp. Physiol.* **144**, 157–163.
- PART, P., TUURALA, H. & SOIVIO, A. (1982). Oxygen transfer, gill resistance and structural changes in rainbow trout (*Salmo gairdneri*) gills perfused with vasoactive agents. *Comp. Biochem. Physiol.* **71C**, 7–13.
- PAYAN, P. & GIRARD, J.-P. (1977). Adrenergic receptors regulating patterns of blood flow through the gills of trout. *Am. J. Physiol.* **232**, H18–H23.
- PETTERSSON, K. & JOHANSEN, K. (1982). Hypoxic vasoconstriction and the effects of adrenaline on gas exchange efficiency in fish gills. *J. exp. Biol.* **97**, 263–272.
- PETTERSSON, K. & NILSSON, S. (1980). Drug induced changes in cardiovascular parameters in the Atlantic cod, *Gadus morhua*. *J. comp. Physiol.* **137**, 131–138.



- PEYRAUD-WAITZENEGGER, M. (1979). Simultaneous modifications of ventilation and arterial pO<sub>2</sub> by catecholamines in the eel, *Anguilla anguilla* L.: Participation of  $\alpha$  and  $\beta$  effects. *J. comp. Physiol.* **129**, 343–354.
- RANKIN, J. C. & MAETZ, J. (1971). A perfused teleostean gill preparation: vascular actions of neurohypophysial hormones and catecholamines. *J. Endocr.* **51**, 621–635.
- REITE, O. B. (1969). The evolution of vascular smooth muscle responses to histamine and 5-hydroxytryptamine. I. Occurrence of stimulatory actions in fish. *Acta physiol. scand.* **75**, 221–239.
- RISTORI, M. T. & LAURENT, P. (1977). Action de l'hypoxie sur le système vasculaire branchial de la tête perfusée de truite. *C.r. Séanc. Soc. Biol.* **171**, 809–813.
- SMITH, D. G. (1977). Sites of cholinergic vasoconstriction in trout gills. *Am. J. Physiol.* **233**, R222–R229.
- SMITH, D. G. & CHAMLEY-CAMPBELL, J. (1981). Localization of smooth muscle myosin in branchial pillar cells of snapper (*Crysophrys auratus*) by immunofluorescence histochemistry. *J. exp. Zool.* **215**, 121–124.
- STEEN, J. B. & KRUYSSSE, A. (1964). The respiratory function of teleostean gills. *Comp. Biochem. Physiol.* **12**, 127–142.
- VOGEL, W. O. P. (1979). The origin of Fromm's arteries in trout gills. *Z. mikrosk.-anat. Forsch.* **92**, 565–570.
- VOGEL, W., VOGEL, V. & SCHLOTE, W. (1974). Ultrastructural study of arteriovenous anastomoses in gill filaments of *Tilapia mossambica*. *Cell Tissue Res.* **155**, 491–512.
- VOGEL, W., VOGEL, V. & PFAUTSCH, M. (1976). Arterio-venous anastomoses in rainbow trout gill filaments. *Cell Tissue Res.* **167**, 373–385.
- WAHLQVIST, I. (1980). Effects of catecholamines on isolated systemic and branchial vascular beds of the cod, *Gadus morhua*. *J. comp. Physiol.* **137**, 139–143.
- WAHLQVIST, I. (1981). Branchial vascular effects of catecholamines released from the head kidney of the Atlantic cod, *Gadus morhua*. *Molecular Physiol.* **1**, 235–241.
- WAHLQVIST, I. & NILSSON, S. (1981). Sympathetic nervous control of the vasculature in the tail of the Atlantic cod, *Gadus morhua*. *J. comp. Physiol.* **144**, 153–156.
- WOOD, C. M. (1975). A pharmacological analysis of the adrenergic and cholinergic mechanisms regulating branchial vascular resistance in the rainbow trout (*Salmo gairdneri*). *Can. J. Zool.* **53**, 1569–1577.
- WOOD, C. M., McMAHON, B. R. & MacDONALD, D. G. (1978). Oxygen exchange and vascular resistance in the totally perfused rainbow trout. *Am. J. Physiol.* **234** (5), R201–R208.
- WOOD, C. M. & SHELTON, G. (1980). Cardiovascular dynamics and adrenergic responses of the rainbow trout *in vivo*. *J. exp. Biol.* **87**, 247–270.
